# Supplementary material
Source: ML conference proceedings conference paper supplement (https://proceedings.neurips.cc/paper_files/paper/2023/hash/3abe23bf7e295b44369c24465d68987a-Abstract.html)
Supplement: Supplementary file 1 [file 3abe23bf7e295b44369c24465d68987a-Supplemental-Conference.pdf]

---

# Supplementary Material for MoSo

---

Haoru Tan<sup>1,3\*</sup>      Sitong Wu<sup>2,3\*</sup>      Fei Du<sup>3,4</sup>

Yukang Chen<sup>2</sup>      Zhibin Wang<sup>3,4</sup>      Fan Wang<sup>3,4</sup>      Xiaojuan Qi<sup>1</sup>

<sup>1</sup>HKU    <sup>2</sup>CUHK    <sup>3</sup>DAMO Academy, Alibaba Group    <sup>4</sup>Hupan Lab, Zhejiang Province

## 1 Mathematical Proof

Before the proof, we first revisit the definition of MoSo.

**Definition 1.** The MoSo score for a specific sample  $z$  selected from the training set  $\mathcal{S}$  is

$$\mathcal{M}(z) = \mathcal{L}(\mathcal{S}/z, \mathbf{w}_{\mathcal{S}/z}^*) - \mathcal{L}(\mathcal{S}/z, \mathbf{w}_{\mathcal{S}}^*), \quad (1)$$

where  $\mathcal{S}/z$  indicates the dataset  $\mathcal{S}$  excluding  $z$ ,  $\mathcal{L}(\cdot)$  is the average cross-entropy loss on the considered set of samples,  $\mathbf{w}_{\mathcal{S}}^*$  is the optimal parameter trained on the full set  $\mathcal{S}$ , and  $\mathbf{w}_{\mathcal{S}/z}^*$  is the optimal parameter on  $\mathcal{S}/z$ .

### 1.1 Proof for Proposition 1.1

**Proposition 1.1.** The MoSo score could be efficiently approximated with linear complexity, that is,

$$\hat{\mathcal{M}}(z) = \mathbb{E}_{t \sim \text{uniform}\{1, \dots, T\}} \left( \eta_t \nabla \mathcal{L}(\mathcal{S}/z, \mathbf{w}_t)^T \nabla l(z, \mathbf{w}_t) \right), \quad (2)$$

where  $\mathcal{S}/z$  indicates the dataset  $\mathcal{S}$  excluding  $z$ ,  $l(\cdot)$  is the cross-entropy loss function and  $\mathcal{L}(\cdot)$  means the average cross-entropy loss,  $\nabla$  is the gradient operator with respect to the network parameters, and  $\{(\mathbf{w}_t, \eta_t)\}_{t=1}^T$  denotes a series of parameters and learning rate during training the surrogate network on  $\mathcal{S}$  with the SGD optimizer.

**Proof.**

Given a specific sample  $z$ , we present a unified loss formulation:

$$\mathcal{L}_\epsilon = \frac{1}{N} \sum_{(x,y) \in \mathcal{L}} l[(x,y), \mathbf{w}] + \epsilon \cdot l[z, \mathbf{w}], \quad (3)$$

where  $\epsilon$  is a coefficient. Hence, we have  $\mathcal{L}(\mathcal{S}, \mathbf{w}) = \mathcal{L}_{\epsilon:0}$  and  $\mathcal{L}(\mathcal{S}/z, \mathbf{w}) = \mathcal{L}_{\epsilon: \frac{-1}{N}}$ . We suppose that, with the SGD optimizer, the training process reaches the optimal solution after  $T$  steps,

$$\mathbf{w}^* = \mathbf{w}_{\mathcal{S}}^T = \arg \min \mathcal{L}_{\epsilon:0}, \quad \mathbf{w}_{\mathcal{S}/z}^* = \mathbf{w}_{\mathcal{S}/z}^T = \arg \min \mathcal{L}_{\epsilon: \frac{-1}{N}}. \quad (4)$$

where  $\mathbf{w}^* = \mathbf{w}_{\mathcal{S}}^T$  and  $\mathbf{w}^t = \mathbf{w}_{\mathcal{S}}^t$  for simplicity.

Hence, the MoSo-score could be re-written as:

$$\mathcal{M}(z) = \mathcal{L}_{\epsilon: \frac{-1}{N}}^T - \mathcal{L}_{\epsilon:0}^T + \frac{1}{N} \cdot l(z, \mathbf{w}_{\mathcal{S}}^T),$$

---

\*Equal contribution.

and, we use  $\mathcal{M}^t(z)$  to denote the empirical risk on  $\mathcal{S}/z$  gap at the  $t$ -th step,

$$\mathcal{M}^t(z) = \mathcal{L}_{\epsilon: \frac{-1}{N}}^t - \mathcal{L}_{\epsilon:0}^t + \frac{1}{N} \cdot l(z, \mathbf{w}_S^t),$$

where  $t \leq T$ . We use  $\mathcal{M}(z)$  to denote  $\mathcal{M}^T(z)$ . Note that the network on the full set  $\mathcal{S}$  and that on the subset  $\mathcal{S}/z$  is started from the same initialization, that is,  $\mathcal{M}^0(z) = 0$ . Let's start with the identical equation below,

$$\begin{aligned} \mathcal{M}(z) &= \left( \mathcal{M}(z) - \mathcal{M}^{T-1}(z) \right) + \left( \mathcal{M}^{T-1}(z) - \mathcal{M}^{T-2}(z) \right) + \dots + \left( \mathcal{M}^1(z) - \mathcal{M}^0(z) \right) + \mathcal{M}^0(z) \\ &= \left( \mathcal{M}(z) - \mathcal{M}^{T-1}(z) \right) + \left( \mathcal{M}^{T-1}(z) - \mathcal{M}^{T-2}(z) \right) + \dots + \left( \mathcal{M}^1(z) - \mathcal{M}^0(z) \right) \\ &= \Delta \mathcal{M}^T + \Delta \mathcal{M}^{T-1} + \dots + \Delta \mathcal{M}^1. \end{aligned} \quad (5)$$

Let's take one single item  $\Delta \mathcal{M}^t$  as an example,

$$\begin{aligned} \Delta \mathcal{M}^t &= \mathcal{M}^t(z) - \mathcal{M}^{t-1}(z) \\ &= \left[ \mathcal{L}_{\epsilon: \frac{-1}{N}}^t - \mathcal{L}_{\epsilon:0}^t + \frac{1}{N} l(z, \mathbf{w}_S^t) \right] - \left[ \mathcal{L}_{\epsilon: \frac{-1}{N}}^{t-1} - \mathcal{L}_{\epsilon:0}^{t-1} + \frac{1}{N} l(z, \mathbf{w}_S^{t-1}) \right] \\ &= \left[ \mathcal{L}_{\epsilon: \frac{-1}{N}}^t - \mathcal{L}_{\epsilon: \frac{-1}{N}}^{t-1} \right] - \left[ \mathcal{L}_{\epsilon:0}^t - \mathcal{L}_{\epsilon:0}^{t-1} \right] + \frac{1}{N} \left[ l(z, \mathbf{w}_S^t) - l(z, \mathbf{w}_S^{t-1}) \right]. \end{aligned} \quad (6)$$

By using the first-order Taylor approximation to approximate  $\mathcal{L}^t$  with  $\mathcal{L}^{t-1}$ , we estimate  $\Delta \mathcal{M}^t$  with,

$$\widehat{\Delta \mathcal{M}}^t = [\nabla \mathcal{L}_{\epsilon: \frac{-1}{N}}^{t-1}]^T (\mathbf{w}_{\mathcal{S}/z}^t - \mathbf{w}_{\mathcal{S}/z}^{t-1}) - [\nabla \mathcal{L}_{\epsilon:0}^{t-1}]^T (\mathbf{w}_S^t - \mathbf{w}_S^{t-1}) + \frac{1}{N} \nabla l(z, \mathbf{w}_S^{t-1})^T (\mathbf{w}_S^t - \mathbf{w}_S^{t-1}). \quad (7)$$

According to the update rule of the SGD optimizer, that is,  $\mathbf{w}^t = \mathbf{w}^{t-1} - \eta_t \nabla \mathcal{L}^{t-1}$ ,  $\Delta \mathcal{M}^t$  could be converted into

$$\widehat{\Delta \mathcal{M}}^t = -\eta_t \|\nabla \mathcal{L}_{\epsilon: \frac{-1}{N}}^t\|^2 + \eta_t \|\nabla \mathcal{L}_{\epsilon:0}^{t-1}\|^2 - \eta_t \frac{1}{N} \nabla l(z, \mathbf{w}_S^{t-1})^T \nabla \mathcal{L}_{\epsilon:0}^{t-1}. \quad (8)$$

Here, we use the Taylor approximation again to approximate  $\nabla \mathcal{L}_{\epsilon: \frac{-1}{N}}^{t-1}$  with  $\nabla \mathcal{L}_{\epsilon:0}^{t-1}$ ,

$$\begin{aligned} \nabla \mathcal{L}_{\epsilon: \frac{-1}{N}}^{t-1} &\approx \nabla \mathcal{L}_{\epsilon:0}^{t-1} + \frac{\partial \mathcal{L}^{t-1}}{\partial \epsilon} \Big|_{\epsilon=0} \left( \left( \epsilon: \frac{-1}{N} \right) - (\epsilon: 0) \right) \\ &= \nabla \mathcal{L}_{\epsilon:0}^{t-1} - \frac{1}{N} \frac{\partial \nabla \mathcal{L}^{t-1}}{\partial \epsilon} \Big|_{\epsilon=0}, \end{aligned} \quad (9)$$

where  $\frac{\partial \nabla \mathcal{L}^{t-1}}{\partial \epsilon} \Big|_{\epsilon=0} = \nabla l(z, \mathbf{w}_S^{t-1})$ . By substituting Eq. (9) into Eq. (8), we have that,

$$\begin{aligned} \widetilde{\Delta \mathcal{M}}^t &= \frac{\eta_t}{N} \left[ \nabla \mathcal{L}_{\epsilon:0}^{t-1} - \frac{1}{N} \nabla l(z, \mathbf{w}_S^{t-1}) \right]^T \nabla l(z, \mathbf{w}_S^{t-1}) \\ &= \frac{\eta_t}{N} \nabla \mathcal{L}(\mathcal{S}/z, \mathbf{w}_S^{t-1})^T \nabla l(z, \mathbf{w}_S^{t-1}). \end{aligned} \quad (10)$$

By substituting Eq. (10) into Eq. (5), we have that,

$$\begin{aligned} \mathcal{M}(z) &= \Delta \mathcal{M}^T + \Delta \mathcal{M}^{T-1} + \dots + \Delta \mathcal{M}^1 \\ &\approx \widetilde{\Delta \mathcal{M}}^T + \widetilde{\Delta \mathcal{M}}^{T-1} + \dots + \widetilde{\Delta \mathcal{M}}^1 \\ &= \sum_t \frac{\eta_t}{N} \nabla \mathcal{L}(\mathcal{S}/z, \mathbf{w}_t)^T \nabla l(z, \mathbf{w}_t), \\ &= \frac{T}{N} \sum_t \frac{\eta_t}{T} \nabla \mathcal{L}(\mathcal{S}/z, \mathbf{w}_t)^T \nabla l(z, \mathbf{w}_t) \\ &= \frac{T}{N} \cdot \mathbb{E}_{t \sim \text{uniform}\{1, \dots, T\}} \left( \eta_t \nabla \mathcal{L}(\mathcal{S}/z, \mathbf{w}_t)^T \nabla l(z, \mathbf{w}_t) \right). \end{aligned} \quad (11)$$

In practice,  $\frac{T}{N}$  is just a constant that contributes little, where  $N$  is the number of all training data and  $T$  is the number of update steps in training. Moreover, sometimes numerical instability may occur due to factors such as  $N$  or  $T$  being too large, so we completely ignore this insignificant constant in our applications. Thus, we have the final approximator,

$$\hat{\mathcal{M}}(z) = \mathbb{E}_{t \sim \text{uniform}\{1, \dots, T\}} \left( \eta_t \nabla \mathcal{L}(\mathcal{S}/z, \mathbf{w}_t)^T \nabla l(z, \mathbf{w}_t) \right).$$

So, Proposition 1.1 has been proven.

## 1.2 Proof for Proposition 1.2

**Proposition 1.2.** *By supposing the loss function is  $\ell$ -Lipschitz continuous and the gradient norm of the network parameter is upper-bounded by  $g$ , and setting the learning rate as a constant  $\eta$ , the approximation error of Eq. (2) is bounded by:*

$$|\mathcal{M}(z) - \hat{\mathcal{M}}(z)| \leq \mathcal{O}\left((\ell\eta + 1)gT + \eta g^2 T\right), \quad (12)$$

where  $T$  is the maximum iteration.

### 1.2.1 Proof for Proposition 1.2.

Note that the final approximator is the time domain mathematical expectation for  $\Delta \widetilde{\mathcal{M}}^t$ , which is used to replace the untraceable  $\Delta \mathcal{M}^t$ , so we analyze the overall error by starting from  $|\Delta \mathcal{M}^t - \Delta \widetilde{\mathcal{M}}^t|$ ,

$$|\Delta \mathcal{M}^t - \Delta \widetilde{\mathcal{M}}^t| \leq |\Delta \mathcal{M}^t - \Delta \widehat{\mathcal{M}}^t| + |\Delta \widehat{\mathcal{M}}^t - \Delta \widetilde{\mathcal{M}}^t|,$$

where the first  $|\Delta \mathcal{M}^t - \Delta \widehat{\mathcal{M}}^t|$  occurs when approximating  $\mathcal{L}^t$  with  $\mathcal{L}^{t-1}$  in Eq.(7), the other one occurs when approximating  $\nabla \mathcal{L}_{\epsilon; \frac{1}{N}}^{t-1}$  with  $\nabla \mathcal{L}_{\epsilon; 0}^{t-1}$  in Eq.(9).

As for the first approximation error,

$$\begin{aligned} \mathcal{O}(|\Delta \mathcal{M}^t - \Delta \widehat{\mathcal{M}}^t|) &\propto \mathcal{O}(|\mathcal{L}^t - \widehat{\mathcal{L}}^t|) \\ &= \mathcal{O}(|\mathcal{L}^t - \mathcal{L}^{t-1} - \nabla \mathcal{L}^{t-1}(\mathbf{w}^t - \mathbf{w}^{t-1})|) \\ &\leq \mathcal{O}(|\mathcal{L}^t - \mathcal{L}^{t-1}| + |\nabla \mathcal{L}^{t-1}(\mathbf{w}^t - \mathbf{w}^{t-1})|), \end{aligned} \quad (13)$$

since the loss function is  $\ell$ -Lipschitz continuous by the mild assumption, we have that,

$$\mathcal{O}(|\mathcal{L}^t - \mathcal{L}^{t-1}| + |\nabla \mathcal{L}^{t-1}(\mathbf{w}^t - \mathbf{w}^{t-1})|) \leq \mathcal{O}(\ell|\mathbf{w}^t - \mathbf{w}^{t-1}| + |\nabla \mathcal{L}^{t-1}(\mathbf{w}^t - \mathbf{w}^{t-1})|), \quad (14)$$

according to the update rule in SGD, we have  $\mathbf{w}^t = \mathbf{w}^{t-1} - \eta \nabla \mathcal{L}^{t-1}$ , so,

$$\mathcal{O}(|\Delta \mathcal{M}^t - \Delta \widehat{\mathcal{M}}^t|) \leq \mathcal{O}(\ell\eta|\nabla \mathcal{L}^{t-1}| + \eta\|\nabla \mathcal{L}^{t-1}\|^2). \quad (15)$$

Since the gradient norm is upper-bounded by a constant  $g$ , thus,

$$\mathcal{O}(|\Delta \mathcal{M}^t - \Delta \widehat{\mathcal{M}}^t|) \leq \mathcal{O}(\ell\eta g + \eta g^2). \quad (16)$$

As for the second approximation error term  $\mathcal{O}(|\Delta \widehat{\mathcal{M}}^t - \Delta \widetilde{\mathcal{M}}^t|)$ , since it estimates  $\nabla \mathcal{L}_{\epsilon; \frac{1}{N}}^{t-1}$  with  $\nabla \mathcal{L}_{\epsilon; 0}^{t-1}$  in Eq.(9), we have that,

$$\begin{aligned} \mathcal{O}(|\Delta \widehat{\mathcal{M}}^t - \Delta \widetilde{\mathcal{M}}^t|) &\propto |\nabla \mathcal{L}_{\epsilon; \frac{1}{N}}^{t-1} - \nabla \mathcal{L}_{\epsilon; \frac{1}{N}}^{t-1}| \\ &= |\nabla \mathcal{L}_{\epsilon; \frac{1}{N}}^{t-1} - (\nabla \mathcal{L}_{\epsilon; 0}^{t-1} - \frac{1}{N} \frac{\partial \nabla \mathcal{L}^{t-1}}{\partial \epsilon}|_{\epsilon=0})| \\ &\leq |\nabla \mathcal{L}_{\epsilon; \frac{1}{N}}^{t-1}| + |\nabla \mathcal{L}_{\epsilon; 0}^{t-1}| + \left| \frac{1}{N} \frac{\partial \nabla \mathcal{L}^{t-1}}{\partial \epsilon} \Big|_{\epsilon=0} \right|, \end{aligned} \quad (17)$$

where  $\frac{\partial \nabla \mathcal{L}^{t-1}}{\partial \epsilon} \Big|_{\epsilon=0} = \nabla l(z, \mathbf{w}_S^{t-1})$ . Since the gradient norm is bounded by constant  $g$  and  $N$  is generally a quite big value (e.g.,  $N = 1M$  for ImageNet), so,

$$|\nabla \mathcal{L}_{\epsilon; \frac{1}{N}}^{t-1}| + |\nabla \mathcal{L}_{\epsilon; 0}^{t-1}| + \left| \frac{1}{N} \frac{\partial \nabla \mathcal{L}^{t-1}}{\partial \epsilon} \Big|_{\epsilon=0} \right| \approx \mathcal{O}(g). \quad (18)$$

By jointly considering Eq.(16) and Eq.(18) and then taking the summation from  $t = 1$  to  $T$ , we have that,

$$\mathcal{O}(|\mathcal{M}(z) - \hat{\mathcal{M}}(z)|) \leq \mathcal{O}(\ell\eta gT + \eta g^2T + gT) = \mathcal{O}((\ell\eta + 1)gT + \eta g^2T).$$

Proposition 1.2 has been proven.
